# Supplementary material for: Hybrid nanostructures of urchin-like MnCo 2 O 4.5 micro flowers on N, B co-doped rGO for electrochemical determination of paracetamol
Source: Royal Society of Chemistry journal article supplement (doi:10.1039/d4tb02164a), 2024-12-02
Supplement: d4tb02164a1.pdf [file d4tb02164a1.pdf]

## **Hybrid nanostructures of urchin-like $\text{MnCo}_2\text{O}_{4.5}$ micro flowers on N, B co-doped rGO for electrochemical determination of paracetamol**

N. Yavai<sup>1</sup>, Kh. Ghanbari<sup>\*1</sup>

*<sup>1</sup>Department of Analytical Chemistry, Faculty of Chemistry, Alzahra University, P. O. Box 1993893973,  
Tehran, Iran*

---

\*Corresponding author. Tel.: +98 21 88044040; fax: +98 21 88035187.  
E-mail address: kh.ghanbari@alzahra.ac.ir (kh\_ghanb@yahoo.com).

### *Chemicals and Instruments*

All materials used in this study were analytical reagent grade. Graphite powder, paraffin,  $\text{Mn}(\text{NO}_3)_2 \cdot 4\text{H}_2\text{O}$ ,  $\text{Co}(\text{NO}_3)_2 \cdot 6\text{H}_2\text{O}$ ,  $\text{NaNO}_3$ , Paracetamol (PAR), sodium hydroxide (NaOH), sulfuric acid ( $\text{H}_2\text{SO}_4$ ), ethanol, boric acid ( $\text{H}_3\text{BO}_3$ ), hydrazine, Urea, phosphoric acid ( $\text{H}_3\text{PO}_4$ ),  $\text{Na}_2\text{HPO}_4$ , and  $\text{KH}_2\text{PO}_4$  from Sigma-Aldrich or Merck were obtained. Phosphate buffer solution (PBS, 0.1 M, pH 7.2) was used as a supporting electrolyte. All solutions were prepared with double-distilled water. All experiments were done at room temperature (22-25 °C). A Tensor 27 (Bruker) instrument was used for ATR-FTIR analysis. The surface properties and morphologies and energy dispersive X-ray analysis (EDS) were examined by field emission scanning electron microscopy with an accelerating voltage of 20 kV (FE-SEM) (MIRA 3, TESCAN, Czech Republic). A Metrohm Autolab B. V.® Autolab PGSTAT 204 potentiostat/galvanostat (Utrecht, UT, the Netherlands) was used to carry out all electrochemical experiments. As a working electrode, a bare or modified carbon paste electrode (CPE, diameter=3.5 mm), as a counter electrode, a platinum wire, and as a reference electrode an Ag/AgCl/saturated KCl was used as a three-electrode cell system.

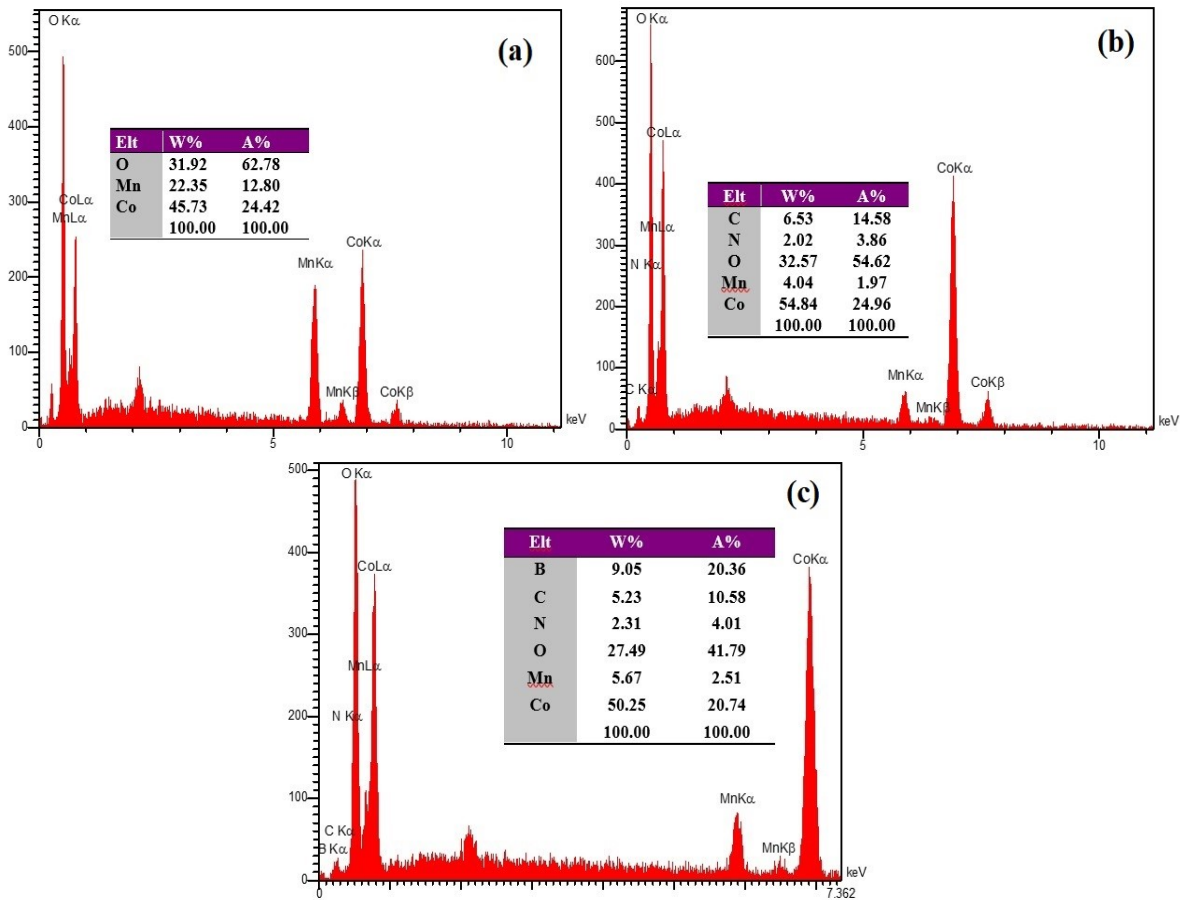

**Fig. S1.** EDX patterns of (a)  $\text{MnCo}_2\text{O}_{4.5}$ , (b)  $\text{MnCo}_2\text{O}_{4.5}/\text{N-rGO}$ , and (c)  $\text{MnCo}_2\text{O}_{4.5}/\text{BN-rGO}$ .

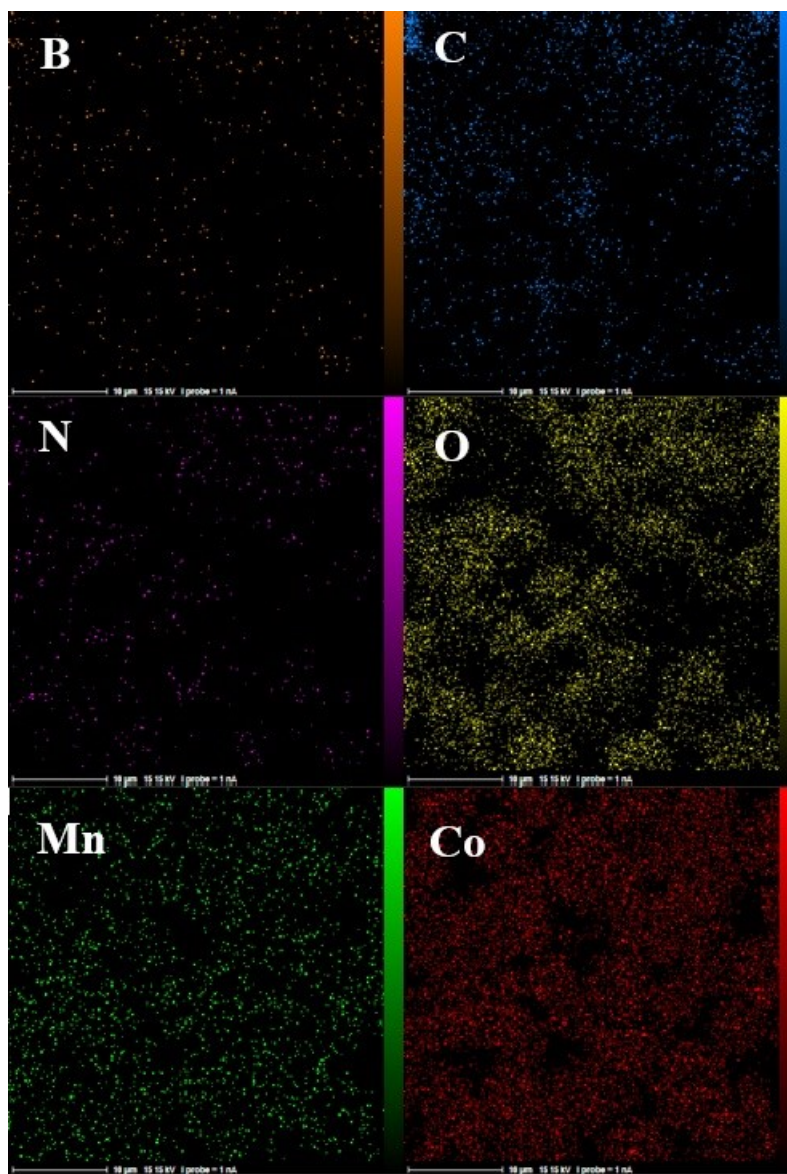

**Fig. S2.** Elemental mapping of MnCo<sub>2</sub>O<sub>4.5</sub>/BN-RGO nanocomposite.

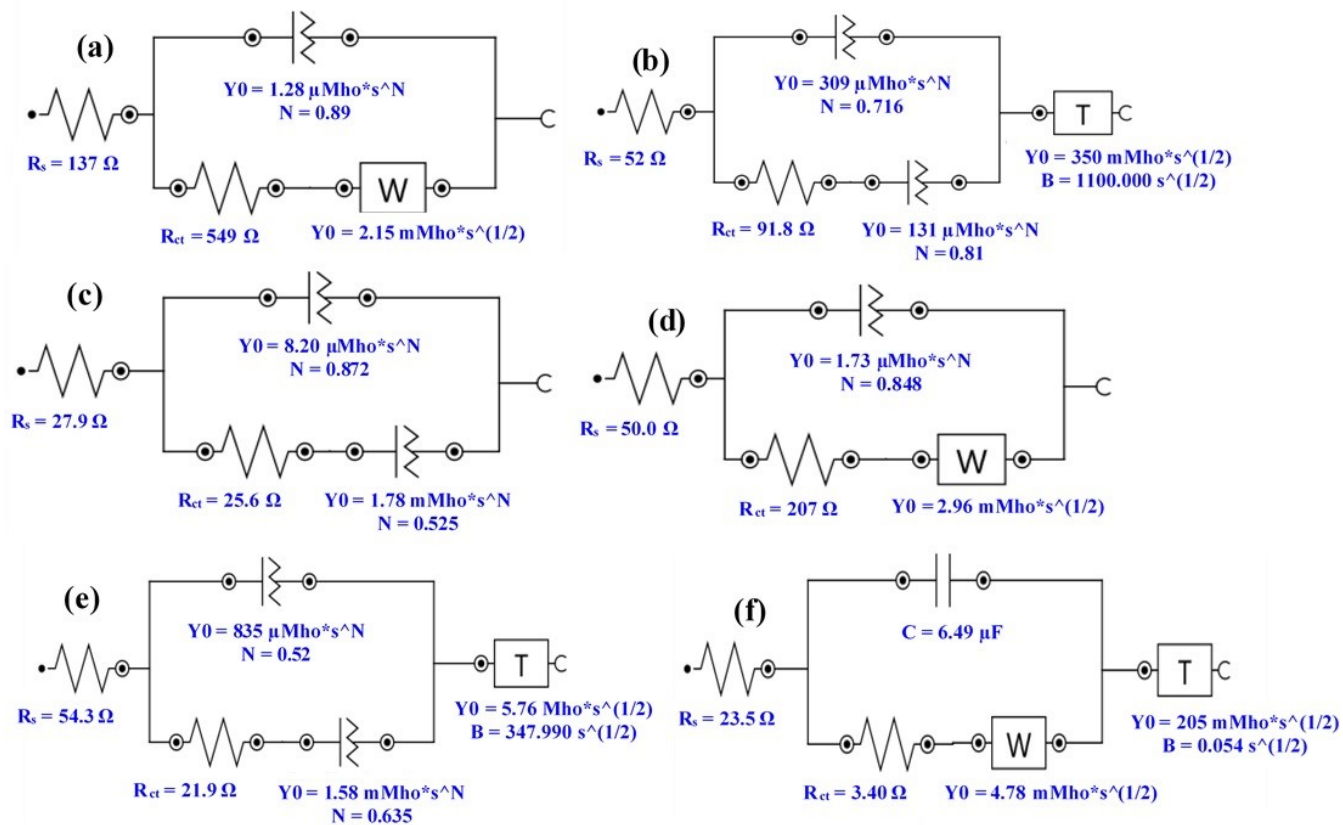

**Fig. S3.** Equivalent circuits for bare (a) bare CPE, (b) rGO/CPE, (c) BN-rGO/CPE, (d) MnCo<sub>2</sub>O<sub>4.5</sub>/CPE, (e) MnCo<sub>2</sub>O<sub>4.5</sub>/rGO/CPE, and (f) MnCo<sub>2</sub>O<sub>4.5</sub>/BN-rGO/CPE

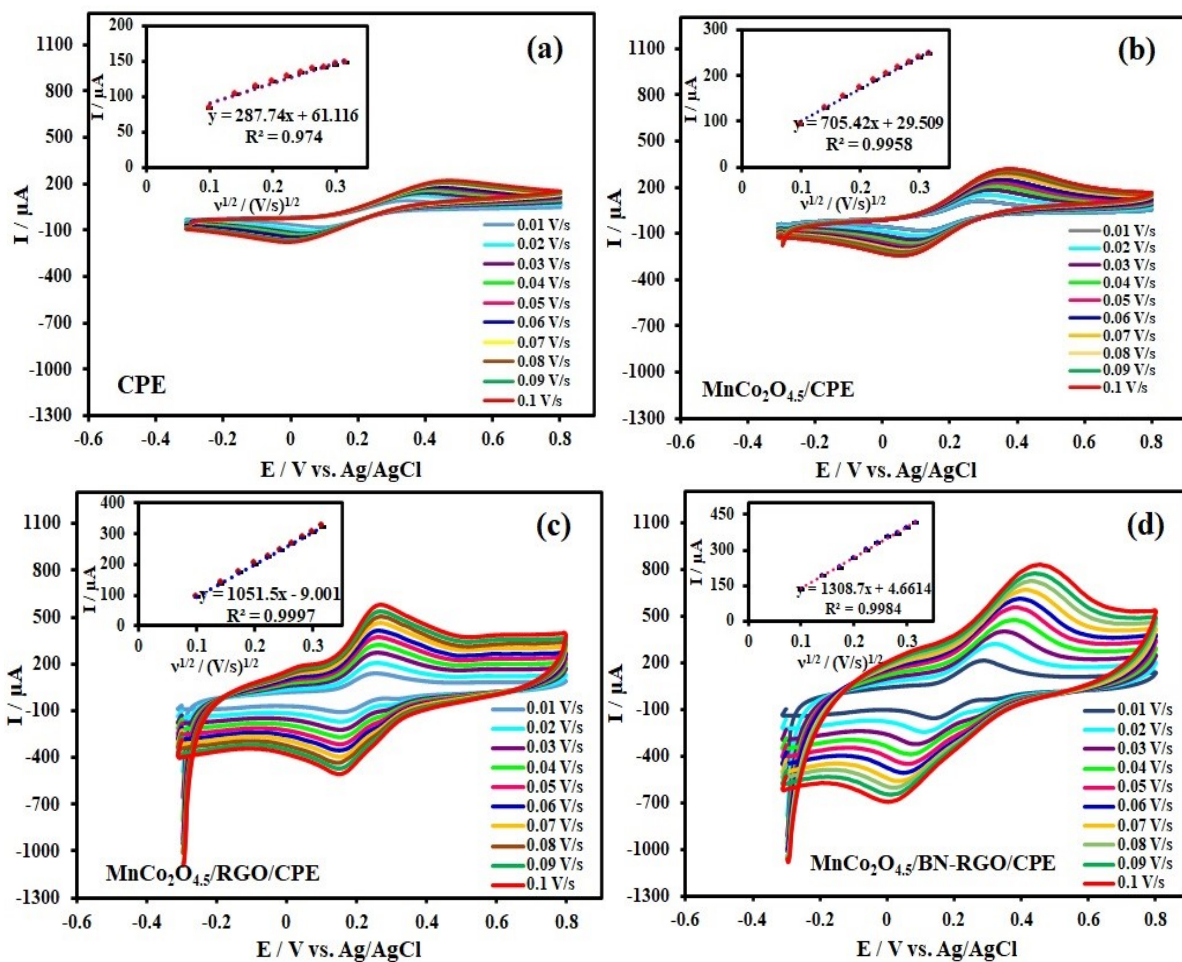

**Fig. S4.** Cyclic voltammograms of 0.1 M KCl solution containing 5.0 mM  $\text{Fe}(\text{CN})_6^{3-/4-}$ , at different scan rates (10 to 100  $\text{mV s}^{-1}$ ) at the surface of (a) bare CPE, (b)  $\text{MnCo}_2\text{O}_{4.5}/\text{CPE}$ , (c)  $\text{MnCo}_2\text{O}_{4.5}/\text{RGO}/\text{CPE}$ , and (d)  $\text{MnCo}_2\text{O}_{4.5}/\text{BN-RGO}/\text{CPE}$ . Insets: a plot of  $I_p$  vs.  $v^{1/2}$  obtained from cyclic voltammograms.



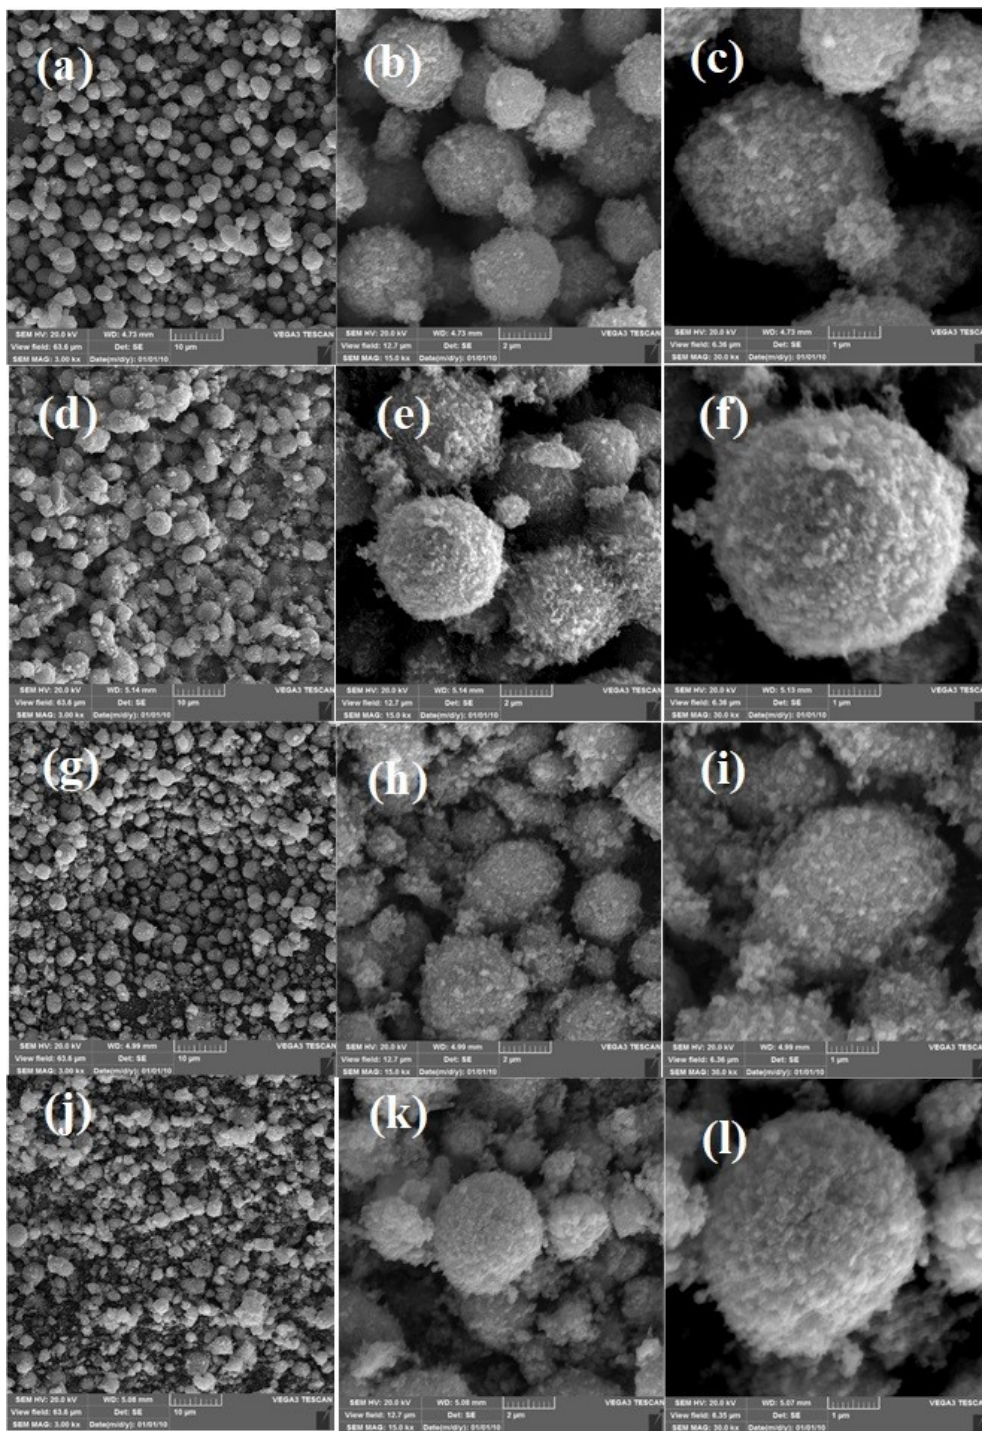

**Fig. S5.** Optimization of the amount of urea (a-c) 10 mmol; (d-f) 23 mmol; (g-i) 46 mmol; and (j-l) 69 mmol for synthesis  $\text{MnCo}_2\text{O}_{4.5}$ .

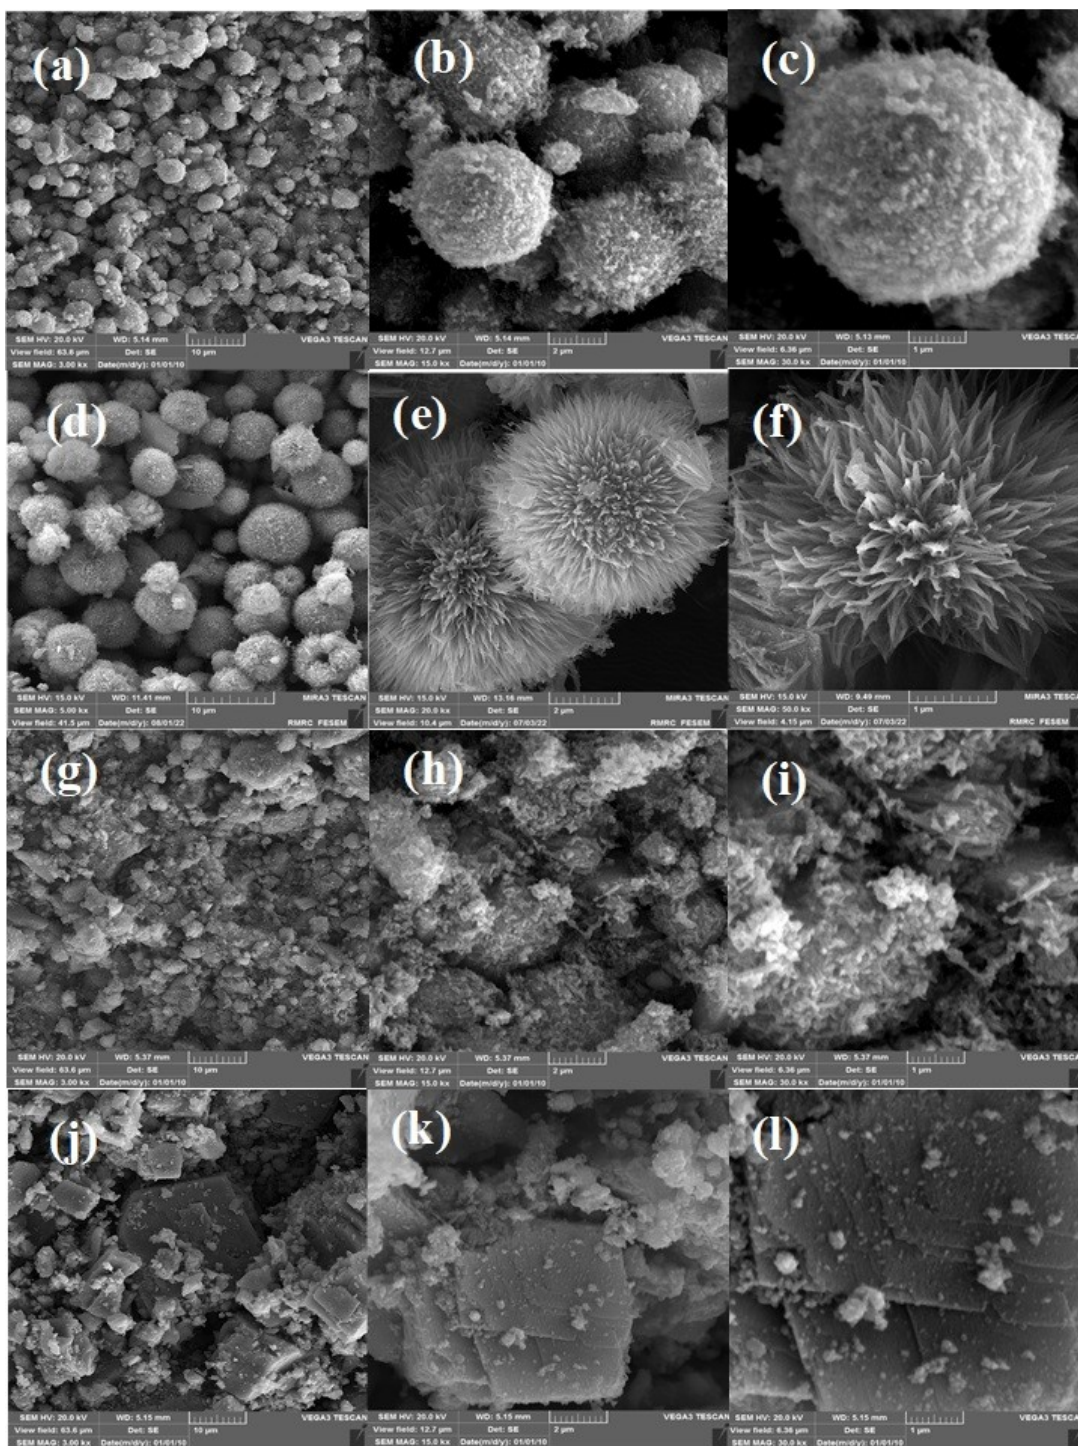

**Fig. S6.** Optimization of the oven temperature (a-c) 90 °C; (d-f) 120 °C; (g-i) 150 °C; and (j-l) 180 °C for synthesis  $\text{MnCo}_2\text{O}_{4.5}$



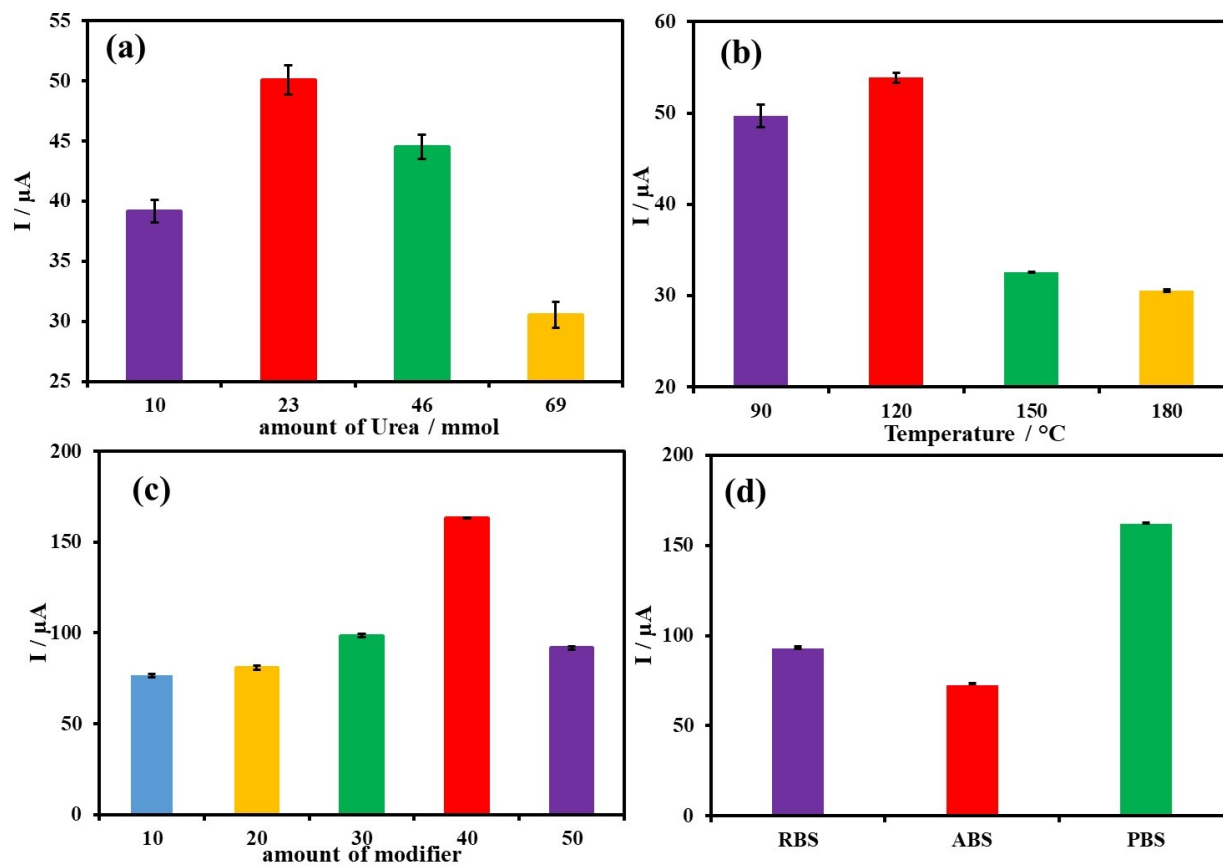

**Fig. S7.** Optimization of different conditions affecting the determination of PAR. Variation of electrode response for 1.0 mM PAR with changes of (a) the amount of urea; (b) the oven temperature for synthesis  $\text{MnCo}_2\text{O}_{4.5}$ ; (c) the amount of modifier, and (d) the buffer type.

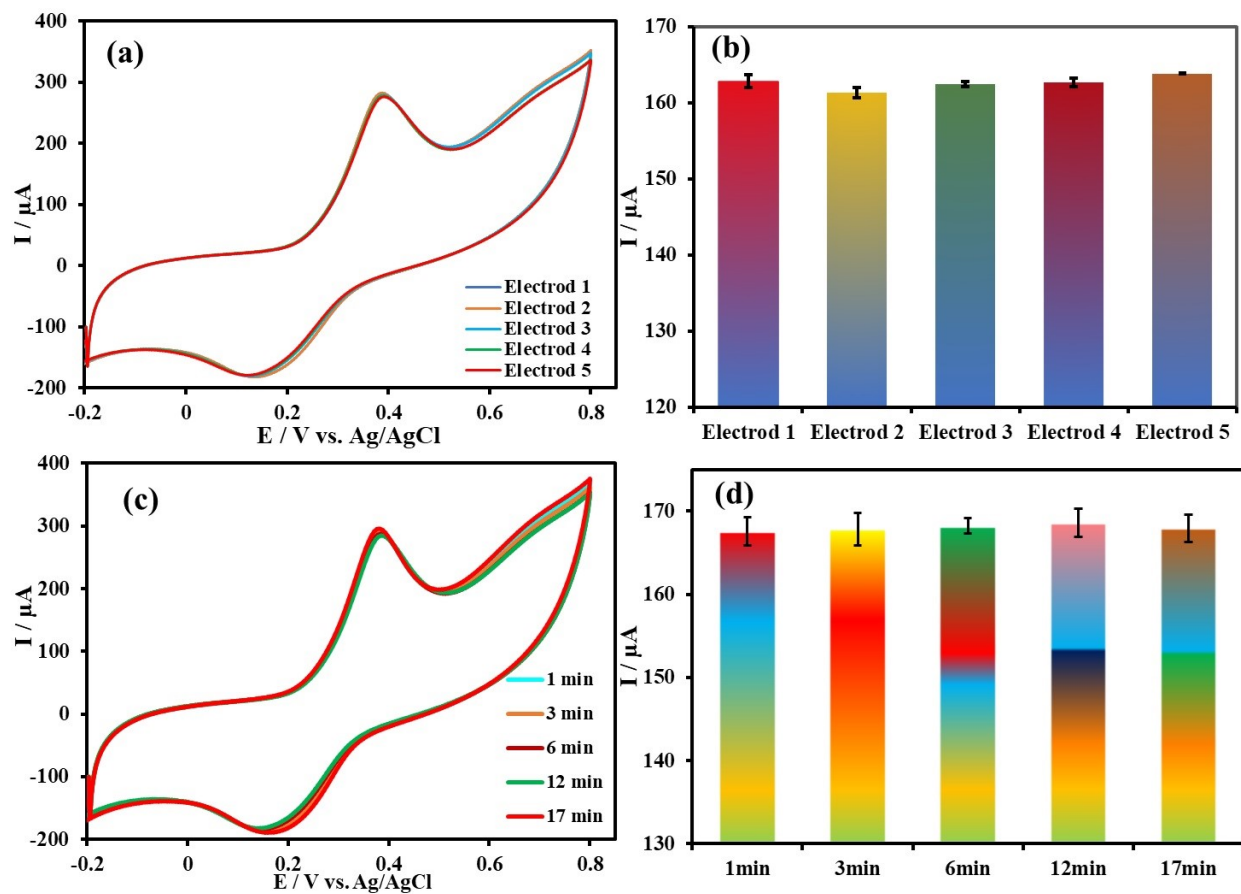

**Fig S8.** CVs of MnCo<sub>2</sub>O<sub>4.5</sub>/BN-rGO/CPE in 50 μM PAR and 0.1 M PBS solution (pH = 7.2) to investigate: (a) reproducibility; (b) corresponding bar diagram of current vs. number of the electrode; (c) repeatability; (d) corresponding bar diagram of current to times;

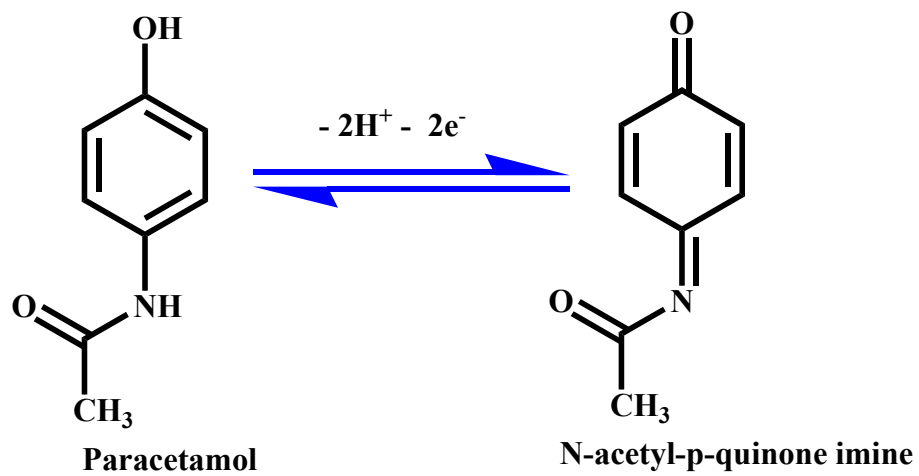

**Scheme S1.** Mechanism of the electrochemical oxidation of paracetamol.
